# Supplementary material
Source: Springer Nature journal article supplement (https://www.springermedizin.de/resource/supplementary/13054_2014_2450_MOESM4_ESM.pdf/9714056)
Supplement: MOESM4 [file 9714056]

| Author | Year | <u>Steroids</u><br>Event/Total | <u>Control</u><br>Event/Total | Relative Risk (95% CI) | Weight |
|--------|------|--------------------------------|-------------------------------|------------------------|--------|
|--------|------|--------------------------------|-------------------------------|------------------------|--------|

**RCTs**

|                                         |      |       |       |                   |        |
|-----------------------------------------|------|-------|-------|-------------------|--------|
| Weigelt                                 | 1985 | 11/25 | 6/14  | 1.03 (0.49, 2.17) | 7.93   |
| Bernard                                 | 1987 | 30/50 | 31/49 | 0.95 (0.69, 1.29) | 18.57  |
| Bone                                    | 1987 | 26/50 | 8/38  | 2.47 (1.26, 4.83) | 9.19   |
| Luce                                    | 1988 | 9/13  | 12/14 | 0.81 (0.53, 1.23) | 15.07  |
| Meduri                                  | 1998 | 2/16  | 5/8   | 0.20 (0.05, 0.81) | 2.90   |
| Steinberg                               | 2006 | 26/89 | 26/91 | 1.02 (0.65, 1.62) | 13.99  |
| Annan                                   | 2006 | 54/85 | 67/92 | 0.87 (0.71, 1.07) | 22.09  |
| Meduri                                  | 2007 | 15/63 | 12/28 | 0.56 (0.30, 1.03) | 10.25  |
| Subtotal (I-squared = 57.2%, p = 0.022) |      |       |       | 0.91 (0.71, 1.18) | 100.00 |

**Cohort Studies**

|                                         |      |       |        |                    |        |
|-----------------------------------------|------|-------|--------|--------------------|--------|
| Fowler                                  | 1985 | 39/53 | 18/34  | 1.39 (0.97, 1.98)  | 19.14  |
| Headley                                 | 1997 | 4/9   | 17/34  | 0.89 (0.40, 1.99)  | 10.93  |
| Keel                                    | 1998 | 5/13  | 12/18  | 0.58 (0.27, 1.24)  | 11.57  |
| Varpula                                 | 2000 | 3/16  | 3/15   | 0.94 (0.22, 3.94)  | 5.04   |
| Song                                    | 2003 | 43/60 | 9/17   | 1.35 (0.84, 2.18)  | 16.73  |
| Lee                                     | 2005 | 1/12  | 7/8    | 0.10 (0.01, 0.63)  | 3.19   |
| Bajwa                                   | 2009 | 16/30 | 54/147 | 1.06 (0.56, 1.99)  | 13.74  |
| Brun-Buisson                            | 2011 | 28/83 | 21/125 | 2.59 (1.42, 4.73)  | 14.28  |
| Schellongowski                          | 2011 | 6/14  | 1/3    | 1.29 (0.23, 7.11)  | 3.80   |
| Linko                                   | 2011 | 7/46  | 0/12   | 4.03 (0.25, 65.90) | 1.58   |
| Subtotal (I-squared = 52.4%, p = 0.026) |      |       |        | 1.14 (0.79, 1.65)  | 100.00 |

NOTE: Weights are from random effects analysis

.01

1

100

Steroids beneficial

Steroids harmful
